# Supplementary material for: The electronic structure of diatomic nickel oxide
Source: Royal Society of Chemistry journal article supplement (doi:10.1039/d4cp01796j), 2024-01-01
Supplement: d4cp01796j1.pdf [file d4cp01796j1.pdf]

## Supporting Information

### The Electronic Structure of Diatomic Nickel Oxide

Nickolas A. Joyner, João Gabriel Farias Romeu, Brian Kent, and David A. Dixon\*

The University of Alabama, Department of Chemistry and Biochemistry, Shelby Hall, Tuscaloosa  
AL, 35487-0336, USA

Email: David A. Dixon dadixon@ua.edu

**Ref. 60.** Frisch, M. J.; Trucks, G. W.; Schlegel, H. B.; Scuseria, G. E.; Robb, M. A.; Cheeseman, J. R.; Scalmani, G.; Barone, V.; Petersson, G. A.; Nakatsuji, H.; Li, X.; Caricato, M.; Marenich, A. V.; Bloino, J.; Janesko, B. G.; Gomperts, R.; Mennucci, B.; Hratchian, H. P.; Ortiz, J. V.; Izmaylov, A. F.; Sonnenberg, J. L.; Williams-Young, D.; Ding, F.; Lipparini, F.; Egidi, F.; Goings, J.; Peng, B.; Petrone, A.; Henderson, T.; Ranasinghe, D.; Zakrzewski, V. G.; Gao, J.; Rega, N.; Zheng, G.; Liang, W.; Hada, M.; Ehara, M.; Toyota, K.; Fukuda, R.; Hasegawa, J.; Ishida, M.; Nakajima, T.; Honda, Y.; Kitao, O.; Nakai, H.; Vreven, T.; Throssell, K.; Montgomery, J. A., Jr.; Peralta, J. E.; Ogliaro, F.; Bearpark, M. J.; Heyd, J. J.; Brothers, E. N.; Kudin, K. N.; Staroverov, V. N.; Keith, T. A.; Kobayashi, R.; Normand, J.; Raghavachari, K.; Rendell, A. P.; Burant, J. C.; Iyengar, S. S.; Tomasi, J.; Cossi, M.; Millam, J. M.; Klene, M.; Adamo, C.; Cammi, R.; Ochterski, J. W.; Martin, R. L.; Morokuma, K.; Farkas, O.; Foresman, J. B.; Fox, D. J. Gaussian 16, Revision A.03, Gaussian, Inc., Wallingford CT, **2016**.

**Ref. 62.** Werner, H.-J.; Knowles, P. J.; Manby, F. R.; Black, J. A.; Doll, K.; Heßelmann, A.; Kats, D.; Köhn, A.; Korona, T.; Kreplin, D. A.; Ma, Q.; Miller, T. F., III; Mitrushchenkov, A.; Peterson, K. A.; Polyak, I.; Rauhut, G.; Sibae, M. The Molpro Quantum Chemistry Package. *J. Chem. Phys.* **2020**, *152*, 144107.

**Ref. 63.** Werner, H.-J.; Knowles, P. J.; Knizia, G.; Manby, F. R.; Schütz, M.; Celani, P.; Györffy, W.; Kats, D.; Korona, T.; Lindh, R.; Mitrushchenkov, A.; Rauhut, G.; Shamasundar, K. R.; Adler, T. B.; Amos, R. D.; Bennie, S. J.; Bernhardsson, A.; Berning, A.; Cooper, D. L.; Deegan, M. J. O.; Dobbyn, A. J.; Eckert, F.; Goll, E.; Hampel, C.; Hesselmann, A.; Hetzer, G.; Hrenar, T.; Jansen, G.; Köppl, C.; Lee, S. J. R.; Liu, Y.; Lloyd, A. W.; Ma, Q.; Mata, R. A.; May, A. J.; McNicholas, S. J.; Meyer, W.; Miller, T. F., III; Mura, M. E.; Nicklass, A.; O'Neill, D. P.; Palmieri, P.; Peng, D.; Petrenko, T.; Pflüger, K.; Pitzer, R.; Reiher, M.; Shiozaki, T.; Stoll, H.; Stone, A. J.; Tarroni, R.; Thorsteinsson, T.; Wang, M.; Welborn, M. MOLPRO, version 2020.1, a package of ab initio programs, see <https://www.molpro.net>.

**Table S1. Absolute energies (Hartrees) of Ni, O, and NiO at the icMRCI+Q/awn-DK, CCSD(T)/an-DK, CCSD(T)/awn-DK, and RKS-CCSD(T)/awn-DK levels.**

| Method               | Basis set  | State   | Electronic Energy | R (Å) (opt)        |
|----------------------|------------|---------|-------------------|--------------------|
| CASSCF               | awQ-DK     | Triplet | -1594.020236      | 1.680              |
| CASSCF               | awQ-DK     | Quintet | -1594.025192      | 1.780              |
| icMRCI+Q             | awT-DK     | Triplet | -1594.617182      | 1.602              |
| icMRCI+Q             | awQ-DK     | Triplet | -1594.649092      | 1.600              |
| icMRCI+Q             | awQ-DK     | Quintet | -1594.642726      | 1.680              |
| icMRCI+Q (BDE calc.) | awT-DK     | Triplet | -1594.616654      | 1.602              |
| icMRCI+Q (BDE calc.) | awT-DK     | Triplet | -1594.468467      | 6.000 <sup>a</sup> |
| icMRCI+Q (BDE calc.) | awQ-DK     | Triplet | -1594.648711      | 1.600              |
| icMRCI+Q (BDE calc.) | awQ-DK     | Triplet | -1594.496842      | 6.000 <sup>a</sup> |
| icMRCI+Q (BDE calc.) | CBS awn-DK | Triplet | -1594.667214      | 1.599              |
| icMRCI+Q (BDE calc.) | CBS awn-DK | Triplet | -1594.513218      | 6.00 <sup>a</sup>  |
| CCSD(T) NiO          | aD-DK      | Triplet | -1594.530630      | 1.636              |
| CCSD(T) NiO          | aT-DK      | Triplet | -1594.648699      | 1.625              |
| CCSD(T) NiO          | aQ-DK      | Triplet | -1594.693755      | 1.623              |
| CCSD(T) NiO          | awT-DK     | Triplet | -1595.114970      | 1.625              |
| CCSD(T) NiO          | awQ-DK     | Triplet | -1595.198462      | 1.624              |
| CCSD(T) NiO          | CBS awn-DK | Triplet | -1595.246651      | 1.624 <sup>b</sup> |
| RKS-CCSD(T) NiO      | awT-DK     | Triplet | -1595.111563      | 1.615              |
| RKS-CCSD(T) NiO      | awQ-DK     | Triplet | -1595.194258      | 1.614              |
| RKS-CCSD(T) NiO      | CBS awn-DK | Triplet | -1595.241987      | 1.614 <sup>b</sup> |
| CCSD(T) NiO          | awT-DK     | Quintet | -1595.057724      | 1.685              |
| CCSD(T) NiO          | awQ-DK     | Quintet | -1595.139342      | 1.684              |
| CCSD(T) NiO          | CBS awn-DK | Quintet | -1595.186449      | 1.683 <sup>b</sup> |
| CCSD(T) O            | aT-DK      | Triplet | -75.04261954      |                    |
| CCSD(T) O            | aQ-DK      | Triplet | -75.07747370      |                    |
| CCSD(T) O            | CBS an-DK  | Triplet | -75.09759026      |                    |
| CCSD(T) Ni           | awT-DK     | Triplet | -1519.924437      |                    |
| CCSD(T) Ni           | awQ-DK     | Triplet | -1519.972133      |                    |
| CCSD(T) Ni           | CBS awn-DK | Triplet | -1519.999662      |                    |

<sup>a</sup> Separated atoms for BDE calculation. <sup>b</sup> Value obtained from extrapolated energies with subsequent curve refitting.

**Table S2. Absolute energies (Hartrees) and bond distances (Å) of NiO at the DFT Level**

| Functional       | Electronic Energy | R <sub>e</sub> |
|------------------|-------------------|----------------|
| B1B95            | -244.776736       | 1.605          |
| B1LYP            | -244.672414       | 1.612          |
| B3LYP            | -244.819987       | 1.611          |
| B3P86            | -245.362026       | 1.601          |
| B3PW91           | -244.816634       | 1.605          |
| B971             | -244.711421       | 1.651          |
| B972             | -244.958305       | 1.608          |
| B98              | -244.749661       | 1.650          |
| BP86             | -244.932610       | 1.616          |
| BMK              | -244.050022       | 1.603          |
| CAM-B3LYP        | -244.670260       | 1.647          |
| HSE06            | -244.660065       | 1.602          |
| HS06             | -244.660416       | 1.602          |
| HSE03            | -244.948340       | 1.603          |
| LC- $\omega$ PBE | -244.769096       | 1.590          |
| M052X            | -244.748685       | 1.621          |
| M05              | -244.844554       | 1.623          |
| M062X            | -244.757015       | 1.625          |
| M06              | -244.788893       | 1.599          |
| M06HF            | -244.709253       | 1.673          |
| M08HX            | -244.611761       | 1.632          |
| M11              | -244.705945       | 1.618          |
| MN12SX           | -243.221620       | 1.595          |
| MN15             | -244.890237       | 1.624          |
| mPW1LYP          | -244.672156       | 1.611          |
| mPW1PBE          | -244.739963       | 1.605          |
| mPW1PW91         | -244.791719       | 1.602          |
| mPW3PBE          | -244.774328       | 1.603          |
| N12SX            | -244.253231       | 1.645          |
| O3LYP            | -245.006141       | 1.616          |
| PBE1PBE          | -244.656418       | 1.602          |
| PBEh1PBE         | -244.661570       | 1.602          |
| PBE              | -244.755298       | 1.617          |
| PBE0             | -244.436199       | 1.600          |
| PW91             | -244.887901       | 1.617          |
| SOGGA11X         | -244.645748       | 1.663          |
| SVWN5            | -243.983381       | 1.586          |
| $\tau$ -HCTH     | -245.436178       | 1.621          |
| TPSSh            | -244.733401       | 1.611          |
| $\omega$ B97     | -244.813024       | 1.596          |
| $\omega$ B97X    | -244.708437       | 1.644          |
| $\omega$ B97XD   | -244.712788       | 1.652          |

|       |             |       |
|-------|-------------|-------|
| X3LYP | -244.735765 | 1.610 |
|-------|-------------|-------|
